# Supplementary material for: Feasibility of Prioritizing Drug–Drug-Event Associations Found in Electronic Health Records
Source: PubMed Central journal article supplement — Drug Saf. 2015 Oct 8;39:45–57. doi: 10.1007/s40264-015-0352-2 (PMC4712252; doi:10.1007/s40264-015-0352-2), 2015-10-08
Supplement: 40264_2015_352_MOESM1_ESM.pdf [file 40264_2015_352_MOESM1_ESM.pdf]

## **ELECTRONIC SUPPLEMENTAL MATERIALS**

**Journal: Drug Safety**

**Article: Feasibility of prioritizing Drug-Drug-Event Associations Found in Electronic Health Records**

Juan M. Banda, PhD, Stanford Center for Biomedical Informatics Research, Stanford, CA, USA. 1265 Welch Road, MSOB, Stanford, CA 94305, USA. [jmbanda@stanford.edu](mailto:jmbanda@stanford.edu).  
Phone: (650) 723-6979, Fax: (650) 725-7944

Alison Callahan, PhD, Stanford Center for Biomedical Informatics Research, Stanford, CA, USA.

Rainer Winnenbug, PhD, Stanford Center for Biomedical Informatics Research, Stanford, CA, USA.

Howard R. Strasberg, MD, MS, Wolters Kluwer Health, San Diego, CA, USA.

Aurel Cami, PhD, Division of Emergency Medicine, Boston Children's Hospital, Boston, Massachusetts, United States of America, Department of Pediatrics, Harvard Medical School, Boston, Massachusetts, USA.

Ben Y. Reis, PhD, Division of Emergency Medicine, Boston Children's Hospital, Boston, Massachusetts, United States of America, Department of Pediatrics, Harvard Medical School, Boston, Massachusetts, USA.

Santiago Vilar, PhD, Department of Biomedical Informatics, Columbia University Medical Center, New York, New York, USA.

George Hripcsak, MD, MS, Department of Biomedical Informatics, Columbia University Medical Center, New York, New York, USA.

Michel Dumontier, PhD, Stanford Center for Biomedical Informatics Research, Stanford, CA, USA.

Nigam Haresh Shah, MBBS, PhD, Stanford Center for Biomedical Informatics Research, Stanford, CA, USA.

| Patient Timeline                                                                  | Cell in 2x2 Table | Comment                          |
|-----------------------------------------------------------------------------------|-------------------|----------------------------------|
|  | d                 | No Drug1 or Drug 2 and no Event  |
|  | d                 | Drug 1 or Drug 2 and no Event    |
|  | c                 | Event but no Drug 1 or Drug2     |
|  | c                 | Drug 1 or Drug 2 and Event After |
|  | b                 | Drug 1 and Drug 2 but no Event   |
|  | a                 | Drug 1, Drug 2 and Event After   |

|                  | Event | No Event |
|------------------|-------|----------|
| D1 & D2          | a     | b        |
| At most D1 or D2 | c     | d        |

Figure A. Assignment of patient counts to the exposure-event contingency table for the method developed by Iyer *et al.* (19) to signal drug-drug-event associations from EHR data. This adapted figure shows in the patient timeline column how temporal information for drug exposure is used for cell assignment.

**Table I.** Drug-drug-event associations with a prioritization score  $\geq 4$  with no grouping of sources. The top-ranked associations based on scores from our original source grouping are highlighted in grey.

| Rank | Drug 1           | Drug 2         | Event              | Reporting | Literature | Prediction (DDI + AE) | Prediction (DDI) |                           |                               | Score | Odds Ratio |
|------|------------------|----------------|--------------------|-----------|------------|-----------------------|------------------|---------------------------|-------------------------------|-------|------------|
|      |                  |                |                    |           |            | TWOSIDES              | INDI             | Similarity-based Modeling | Pharmaco Interaction Networks |       |            |
| 1    | cyclophosphamide | carboplatin    | Neutropenia        | 1         | 1          | 1                     | 0                | 0                         | 1                             | 5     | 10.3021    |
| 2    | mercaptopurine   | vincristine    | Neutropenia        | 1         | 0          | 0                     | 1                | 0                         | 1                             | 4     | 53.662     |
| 3    | cyclophosphamide | cisplatin      | Neutropenia        | 1         | 1          | 0                     | 0                | 0                         | 1                             | 4     | 14.3057    |
| 4    | tramadol         | topiramate     | Serotonin syndrome | 0         | 0          | 1                     | 1                | 0                         | 1                             | 4     | 13.6809    |
| 5    | lamotrigine      | mirtazapine    | Serotonin syndrome | 0         | 0          | 1                     | 1                | 0                         | 1                             | 4     | 11.9991    |
| 6    | fludarabine      | methotrexate   | Pancytopenia       | 0         | 0          | 1                     | 1                | 0                         | 1                             | 4     | 7.48325    |
| 7    | thalidomide      | warfarin       | Neutropenia        | 1         | 0          | 1                     | 0                | 0                         | 1                             | 4     | 6.80803    |
| 8    | vincristine      | mercaptopurine | Pancytopenia       | 0         | 0          | 1                     | 1                | 0                         | 1                             | 4     | 6.75531    |
| 9    | lorazepam        | aprepitant     | Neutropenia        | 0         | 0          | 1                     | 1                | 0                         | 1                             | 4     | 5.76483    |
| 10   | tramadol         | amitriptyline  | Serotonin syndrome | 0         | 1          | 0                     | 1                | 1                         | 0                             | 4     | 4.11386    |
| 11   | gemfibrozil      | simvastatin    | Rhabdomyolysis     | 1         | 1          | 1                     | 0                | 0                         | 0                             | 4     | 3.69682    |
| 12   | sumatriptan      | quetiapine     | Serotonin syndrome | 0         | 0          | 1                     | 1                | 0                         | 1                             | 4     | 3.38322    |
| 13   | lorazepam        | buspirone      | Serotonin syndrome | 0         | 0          | 1                     | 1                | 0                         | 1                             | 4     | 3.33973    |
| 14   | digoxin          | carvedilol     | Hyperkalaemia      | 1         | 0          | 1                     | 1                | 0                         | 0                             | 4     | 2.65814    |
| 15   | spironolactone   | atenolol       | Hyperkalaemia      | 1         | 0          | 1                     | 1                | 0                         | 0                             | 4     | 2.60692    |
| 16   | spironolactone   | glimepiride    | Hyperkalaemia      | 1         | 0          | 1                     | 0                | 0                         | 1                             | 4     | 2.27854    |
| 17   | furosemide       | bumetanide     | Hyperkalaemia      | 0         | 0          | 1                     | 1                | 0                         | 1                             | 4     | 1.96399    |
| 18   | atenolol         | glipizide      | Hyperkalaemia      | 0         | 0          | 1                     | 1                | 1                         | 0                             | 4     | 1.78201    |
| 19   | atenolol         | hydralazine    | Hyperkalaemia      | 0         | 0          | 1                     | 1                | 0                         | 1                             | 4     | 1.63373    |
| 20   | furosemide       | nifedipine     | Hyperkalaemia      | 0         | 0          | 1                     | 1                | 0                         | 1                             | 4     | 1.29945    |
| 21   | furosemide       | losartan       | Hyperkalaemia      | 0         | 0          | 1                     | 1                | 0                         | 1                             | 4     | 1.25689    |
| 22   | furosemide       | eplerenone     | Hyperkalaemia      | 1         | 0          | 0                     | 1                | 0                         | 1                             | 4     | 1.15144    |

**Table II.** Drug-drug-event associations with a prioritization score  $\geq 2$  with an alternative grouping of reporting sources, prediction methods and literature. The top-ranked associations based on scores from our original source grouping are highlighted in grey.

| Rank | Drug 1           | Drug 2         | Event              | +<br>Reporting<br>TWO SIDES | Prediction Methods (DDI) | Literature | Score | Odds Ratio |
|------|------------------|----------------|--------------------|-----------------------------|--------------------------|------------|-------|------------|
| 1    | cyclophosphamide | cisplatin      | Neutropenia        | 1                           | 1                        | 1          | 3     | 14.3057    |
| 2    | cyclophosphamide | carboplatin    | Neutropenia        | 1                           | 1                        | 1          | 3     | 10.3021    |
| 3    | daunorubicin     | etoposide      | Neutropenia        | 1                           | 1                        | 0          | 2     | 55.4931    |
| 4    | vincristine      | mercaptopurine | Neutropenia        | 1                           | 1                        | 0          | 2     | 53.662     |
| 5    | daunorubicin     | ondansetron    | Neutropenia        | 1                           | 1                        | 0          | 2     | 45.7784    |
| 6    | cyclophosphamide | etoposide      | Neutropenia        | 0                           | 1                        | 1          | 2     | 33.6945    |
| 7    | vincristine      | doxorubicin    | Neutropenia        | 1                           | 1                        | 0          | 2     | 31.0798    |
| 8    | fludarabine      | allopurinol    | Neutropenia        | 1                           | 1                        | 0          | 2     | 25.8783    |
| 9    | vincristine      | dexamethasone  | Neutropenia        | 1                           | 1                        | 0          | 2     | 25.2882    |
| 10   | doxorubicin      | allopurinol    | Neutropenia        | 1                           | 1                        | 0          | 2     | 24.3974    |
| 11   | olanzapine       | fluvoxamine    | Rhabdomyolysis     | 1                           | 1                        | 0          | 2     | 20.3734    |
| 12   | methotrexate     | allopurinol    | Neutropenia        | 1                           | 1                        | 0          | 2     | 20.1525    |
| 13   | methotrexate     | mercaptopurine | Neutropenia        | 1                           | 1                        | 0          | 2     | 19.973     |
| 14   | doxorubicin      | methotrexate   | Neutropenia        | 1                           | 1                        | 0          | 2     | 17.8509    |
| 15   | ciprofloxacin    | bortezomib     | Neutropenia        | 1                           | 1                        | 0          | 2     | 16.4949    |
| 16   | duloxetine       | eletriptan     | Serotonin syndrome | 1                           | 1                        | 0          | 2     | 14.9939    |
| 17   | ifosfamide       | lorazepam      | Neutropenia        | 1                           | 1                        | 0          | 2     | 14.7006    |
| 18   | tramadol         | topiramate     | Serotonin syndrome | 1                           | 1                        | 0          | 2     | 13.6809    |
| 19   | ifosfamide       | carboplatin    | Neutropenia        | 0                           | 1                        | 1          | 2     | 12.846     |
| 20   | ifosfamide       | methotrexate   | Neutropenia        | 1                           | 1                        | 0          | 2     | 12.7       |
